# Supplementary material for: Mineralization of dental tissues and caries lesions detailed with Raman microspectroscopic imaging
Source: Royal Society of Chemistry journal article supplement (doi:10.1039/d0an01938k), 2020-11-18
Supplement: d0an01938k1.pdf [file d0an01938k1.pdf]

## Mineralization of dental tissues and caries lesions detailed with Raman microspectroscopic imaging

Shuvashis Das Gupta,<sup>a†</sup> Markus Killenberger,<sup>b†</sup> Tarja Tanner,<sup>b</sup> Lassi Rieppo,<sup>a</sup> Simo Saarakkala,<sup>a,c</sup> Jarkko Heikkilä,<sup>b</sup> Vuokko Anttonen,<sup>b,d</sup> and Mikko A. J. Finnilä<sup>a</sup>

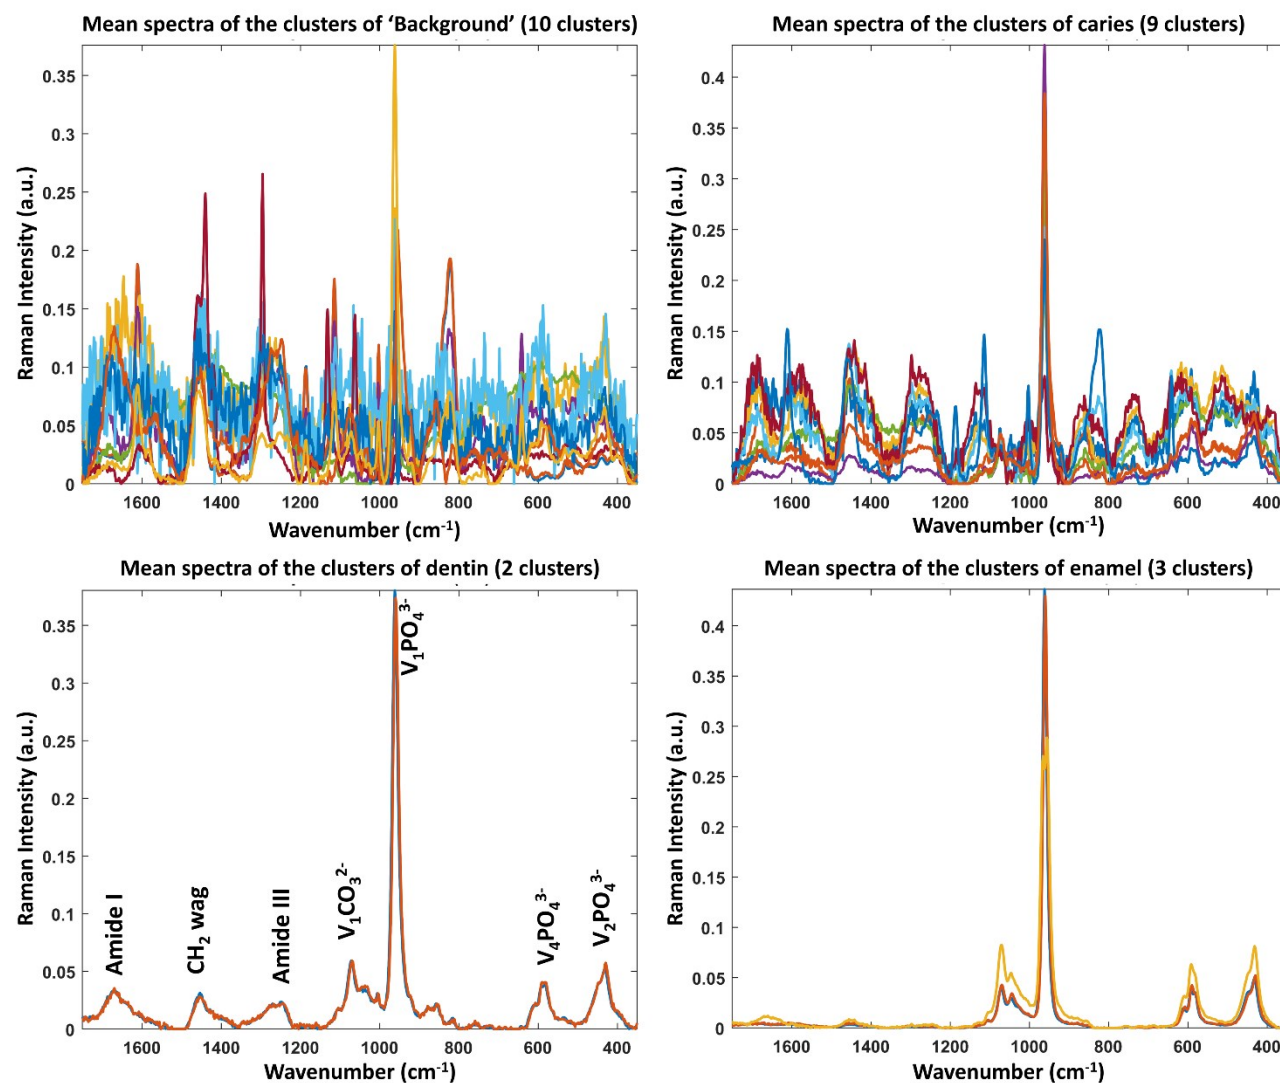

**Supplementary Fig 1.** Mean spectra of clusters. From twenty-four clusters, ten clusters were identified as background, another nine clusters were identified as dental caries, two clusters as dentin, and three clusters as enamel tissue. Major peaks are annotated on the dentin representative spectra.

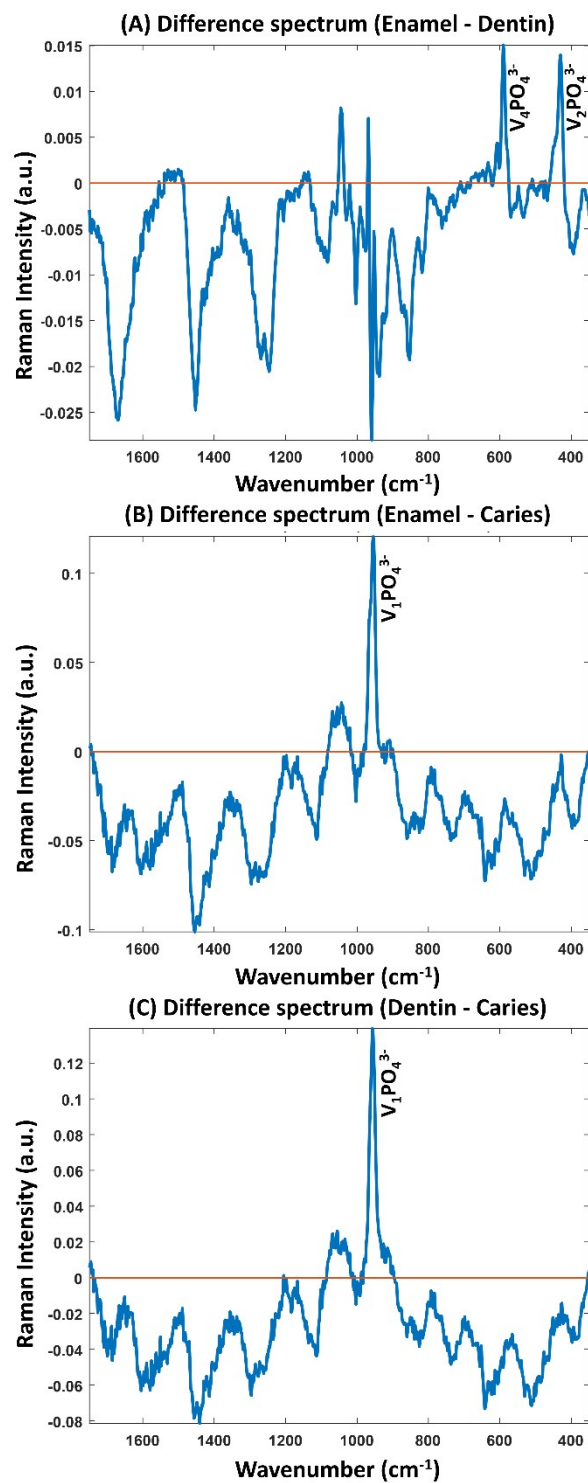

**Supplementary Fig 2.** Difference spectrum between (A) enamel and dentin, (B) enamel and caries, and (C) dentin and caries. Major mineral peaks are annotated.

**Mineral crystallinity**

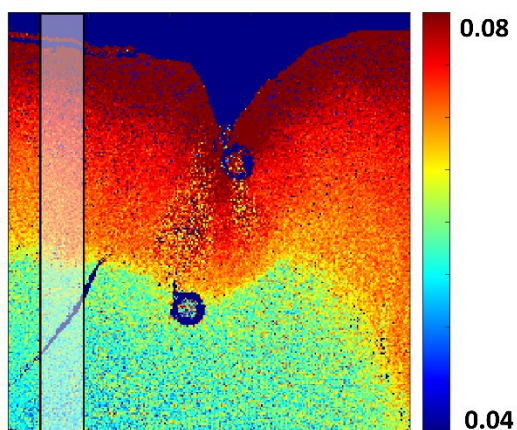

**Depth-wise profile**

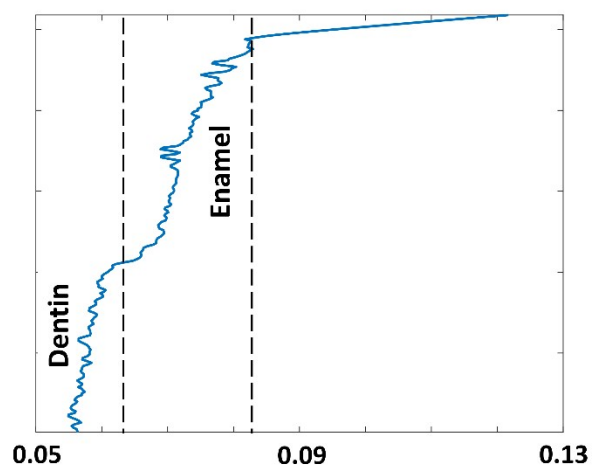

**Type-B carbonate substitution**

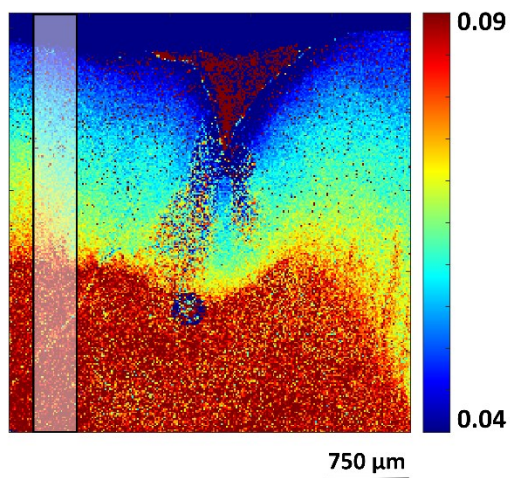

**Depth-wise profile**

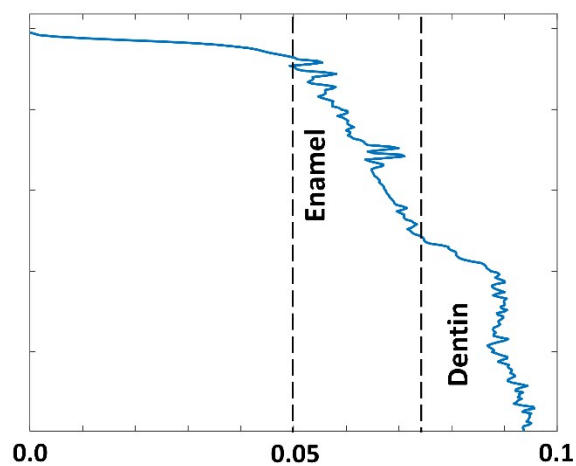

**Supplementary Fig 3.** Gradient profiles of the mineral crystallinity and carbonate substitution in crystal lattice
